# Supplementary material for: Aucubin exerts anti-osteoporotic effects by promoting osteoblast differentiation
Source: PubMed Central journal article supplement (PMC7041723; doi:10.18632/aging.102742), 2020-02-05
Supplement: aging-12-102742-s002..pdf [file aging-12-102742-s002..pdf]

## SUPPLEMENTARY TABLE

Supplementary Table 1. The primer sequences used in RT-PCR.

| Fragment size (bp) | Name              | Sequence (5' to 3')     |
|--------------------|-------------------|-------------------------|
| 458                | Nrf2-F            | GTTGCCACATTCCCAAACAA    |
|                    | Nrf2-R            | CTGGCATCATCAGTGGAGAGG   |
| 254                | NQO1-F            | GAGGTACTCGAATCTGACCTCTA |
|                    | NQO1-R            | ACTCTCTCAAACCAGCCTTTC   |
| 137                | $\beta$ -actin-F  | ATCGTGCGAGACATCAATG     |
|                    | $\beta$ -actin -R | TCGTTGCCTATTGTGATGAC    |
